# Supplementary material for: Patterned, highly stretchable and conductive nanofibrous PANI/PVDF strain sensors based on electrospinning and in situ polymerization
Source: Royal Society of Chemistry journal article supplement (doi:10.1039/c5nr08618c), 2016-01-01
Supplement: c5nr08618c1.pdf [file c5nr08618c1.pdf]

## Supporting Information

### Patterned, highly stretchable and conductive nanofibrous PANI/PVDF strain sensors based on electrospinning and in situ polymerization

Gui-Feng Yu<sup>a),b)†</sup>, Xu Yan<sup>a)†</sup>, Miao Yu<sup>a),c)†</sup>, Meng-Yang Jia<sup>d)</sup>, Wei Pan<sup>a),e)</sup>, Xiao-Xiao He<sup>a)</sup>, Wen-Peng Han<sup>a)</sup>, Zhi-Ming Zhang<sup>d)\*</sup>, Liang-Min Yu<sup>d)</sup>, and Yun-Ze Long<sup>a),f)\*</sup>

1. Image of patterned PANI/PVDF membrane and unwoven PANI/PVDF membrane under different strains.

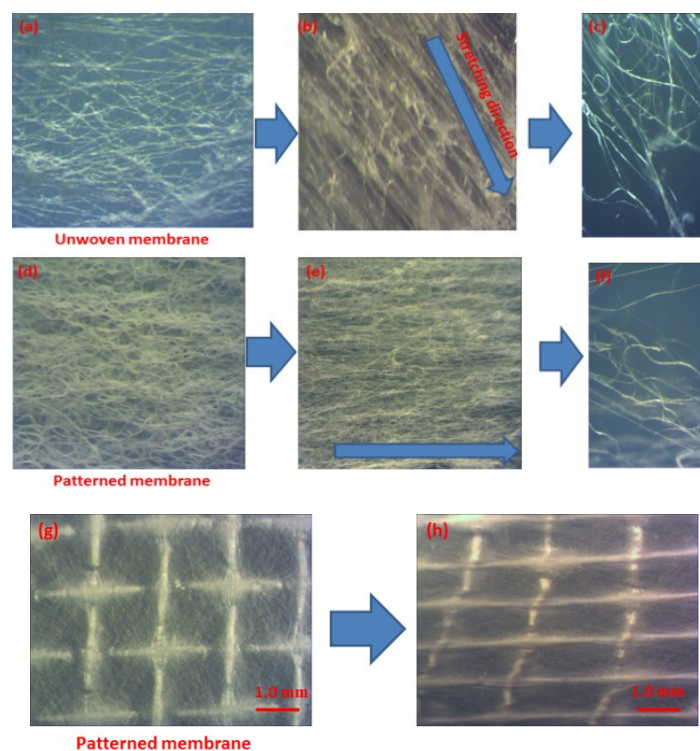

Figure S1 a) Optical image of unwoven membrane without strain; b) image of unwoven membrane under about 10% strain; c) image of unwoven membrane in the point of break. d) Optical image of patterned unwoven membrane without strain; e) image of patterned membrane under about 20% strain; f) image of patterned membrane in the point of break; g) image of patterned membrane under 0 % strain; h) image of patterned membrane under about 40% strain.

2. Stress-strain characteristic of patterned PANI/PVDF membrane and unwoven PANI/PVDF membrane.

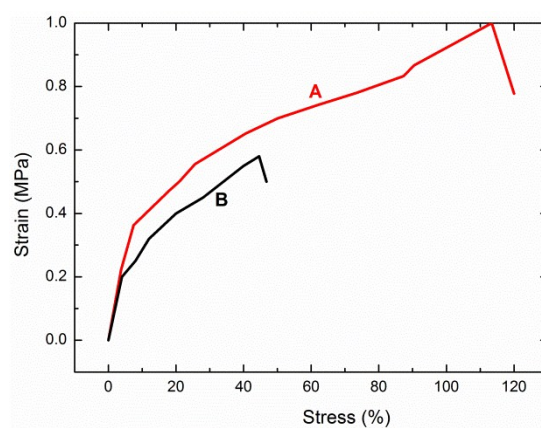

Figure S2 Stress-strain curve for patterned PANI/PVDF membrane (A); unwoven PANI/PVDF membrane (B).
